# Supplementary material for: Density functional theory study of the oxygen reduction reaction mechanism in a BN co-doped graphene electrocatalyst
Source: Royal Society of Chemistry journal article supplement (doi:10.1039/c4ta01460j), 2014-01-01
Supplement: c4ta01460j1.pdf [file c4ta01460j1.pdf]

## Density Functional Theory Study of Oxygen Reduction Reaction Mechanism in BN co-Doped Graphene Electrocatalyst

Shyam Kattel,<sup>1,3</sup> Plamen Atanassov,<sup>2</sup> and Boris Kiefer\*<sup>1</sup>

1. Department of Physics, New Mexico State University, Las Cruces, NM 88003, USA

2. Department of Chemical & Nuclear Engineering, University of New Mexico, Albuquerque,  
NM 87131, USA

3. Department of Mechanical Engineering and Materials Science, University of Pittsburgh,  
PA15261, USA

\*Corresponding author: [bkiefer@nmsu.edu](mailto:bkiefer@nmsu.edu)

### Supplementary Information

In alkaline medium, the complete O<sub>2</sub> reduction can be summarized by the reactions (1-5)<sup>1</sup>

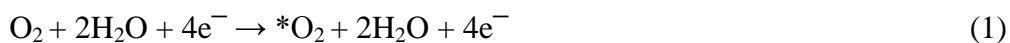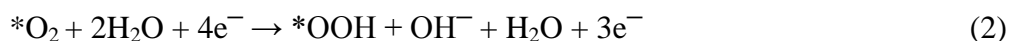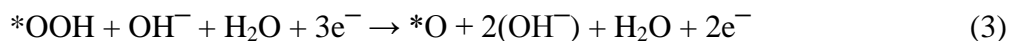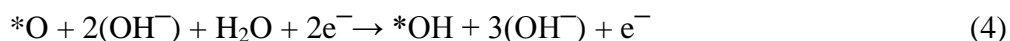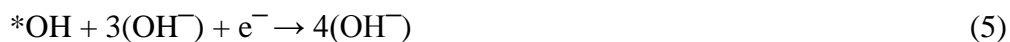

Alternatively, OOH<sup>-</sup> may form as a product in reaction (3) and desorb from the catalyst surface promoting 2e<sup>-</sup> reduction of O<sub>2</sub> to peroxide.

### References

1. L. Yu, X. L. Pan, X. M. Cao, P. Hu and X. H. Bao, *J. Catal.*, 2011, **282**, 183-190.
